# Supplementary material for: The transcript cleavage factor paralogue TFS4 is a potent RNA polymerase inhibitor
Source: PubMed Central journal article supplement (PMC5715097; doi:10.1038/s41467-017-02081-3), 2017-12-04
Supplement: 41467_2017_2081_MOESM1_ESM.pdf [file 41467_2017_2081_MOESM1_ESM.pdf]

# 1 **Supplementary materials and methods**

## 2 **Supplementary methods**

3

### 4 **Potassium permanganate foot-printing**

5 The potassium permanganate foot-printing assays were carried as previously  
6 described<sup>1</sup>. 1  $\mu$ M TBP and 125 nM TFB, 70 nM of RNAP were incubated in transcription  
7 buffer containing 26 mM MgCl<sub>2</sub> and 0.5 mM DTT, in the presence or absence of 3  $\mu$ M  
8 SsoTFE $\alpha/\beta$ , 700 nM TFS1 or TFS4. Samples were incubated for 5 min at 65°C before  
9 the addition of 4 mM KMnO<sub>4</sub>. After additional 5 min incubation at 65°C, the reaction  
10 was stopped by addition of 1.5  $\mu$ l 2-mercaptoethanol. After Proteinase K treatment for  
11 1 hour at 50°C, the samples were ethanol-precipitated. Samples were resuspended in  
12 50  $\mu$ l 1 M piperidine and incubated at 90°C for 30 min. After chloroform-extraction,  
13 samples were ethanol-precipitated and resuspended in 12  $\mu$ l formamide loading dye.  
14 5  $\mu$ l of the samples were separated on 10% polyacrylamide, 7M Urea, 1 $\times$ TBE  
15 sequencing gel. Gels were dried for 1 h at 80°C under vacuum, visualized using  
16 Typhoon FLA 9500 biomolecular imager (GE Healthcare) and analyzed using  
17 ImageQuant TL Software (GE Healthcare).

18

19 **Supplementary tables and figures**

| Super-phylum   | Phylum            | Order                                                         | Representative species                                                 | Number of TFS factors                         | Accession numbers                                             |                                                |
|----------------|-------------------|---------------------------------------------------------------|------------------------------------------------------------------------|-----------------------------------------------|---------------------------------------------------------------|------------------------------------------------|
| ASGARD         | Odinarchaeota     |                                                               | <i>Candidatus</i> <i>Odinarchaeota</i> archaeon CB_4                   | 1                                             | OLS17806.1                                                    |                                                |
|                | Lokiarchaeota     |                                                               | <i>Lokiarchaeum</i> sp. G14_75                                         | 2                                             | KKK43059.1; KKK43557.1                                        |                                                |
|                | Thorarchaeota     |                                                               | <i>Candidatus</i> <i>Thorarchaeota</i> archaeon SMTZ1-45               | 2                                             | KXH72617.1; KXH71193.1                                        |                                                |
|                | Heimdallarchaeota |                                                               | <i>Candidatus</i> <i>Heimdallarchaeota</i> archaeon AB_125             | 2                                             | OLS32995.1; OLS32960.1                                        |                                                |
| TACK           | Thaumarchaeota    |                                                               | <i>Thaumarchaeota</i> archaeon CSP1-1                                  | 1                                             | KRT60970.1                                                    |                                                |
|                | Aigarchaeota      |                                                               | <i>Caldiarchoaeum</i> <i>subterraneum</i>                              | 1                                             | BAJ47392.1                                                    |                                                |
|                | Crenarchaeota     | Sulfolobales                                                  |                                                                        | <i>Sulfolobus</i> <i>solfataricus</i> P2      | 4                                                             | AAK40629.1; AAK40916.1; AAK40629.1; AAK42105.1 |
|                |                   | Acidilobales                                                  |                                                                        | <i>Acidilobus</i> <i>saccharovorans</i> 45-15 | 2                                                             | ADL18862.1; ADL19509.1                         |
|                |                   | Desulfococcales                                               |                                                                        | <i>Ignicoccus</i> <i>landicus</i> DSM 13165   | 2                                                             | ALU11731.1; ALU11838.1                         |
|                |                   | Thermoproteales                                               |                                                                        | <i>Thermoproteus</i> <i>tenax</i> Kra1        | 2                                                             | CCC81245.1; CCC81368.1                         |
|                | Korarchaeota      |                                                               | <i>Candidatus</i> <i>Korarchaeum</i> <i>cryptofilum</i> DP8            | 1                                             | ACB07793.1                                                    |                                                |
| Bathyarchaeota |                   | <i>Candidatus</i> <i>Bathyarchaeota</i> archaeon RBG_16_48_13 | 1                                                                      | OGD46939.1                                    |                                                               |                                                |
| Euryarchaeota  | Archaeoglobi      |                                                               | <i>Archaeoglobus</i> <i>sulfatallidus</i> PM70-1                       | 1                                             | AGK60260.1                                                    |                                                |
|                | Halobacteria      |                                                               | <i>Haloferax</i> <i>volcanii</i> DS2                                   | 4                                             | ADE03944.1; ADE05146.1; <u>ADE01865.1</u> ; <u>ADE01888.1</u> |                                                |
|                | Methanobacteria   |                                                               | <i>Methanosphaera</i> <i>stadtmanae</i> DSM 3091                       | 2                                             | ABC57900.1; ABC57619.1                                        |                                                |
|                | Methanococci      |                                                               | <i>Methanocaldococcus</i> <i>annaschii</i> DSM 2661                    | 1                                             | AAB99148.1                                                    |                                                |
|                | Methanomicrobia   |                                                               | <i>Methanosarcina</i> <i>nazei</i> G01                                 | 1                                             | AAM31094.1                                                    |                                                |
|                | Methanopyri       |                                                               | <i>Methanopyrus</i> <i>kandleri</i>                                    | 0                                             |                                                               |                                                |
|                | Thermococci       |                                                               | <i>Pyrococcus</i> <i>furiosus</i> DSM 3638                             | 1                                             | AAL81110.1                                                    |                                                |
|                | Thermoplasmata    |                                                               | <i>Thermoplasma</i> <i>acidophilum</i>                                 | 1                                             | CAC12135.1                                                    |                                                |
| DPANN          | Diapherotrites    |                                                               | <i>Candidatus</i> <i>Dainarchaeum</i> <i>andersonii</i> SCGC AA011-E11 | ?                                             |                                                               |                                                |
|                | Parvarchaeota     |                                                               | <i>Candidatus</i> <i>Parvarchaeum</i> <i>acidiphilum</i> ARMAN-4       | 1                                             | EEZ93161.1                                                    |                                                |
|                | Aenigmarchaeota   |                                                               | <i>Candidatus</i> <i>Aenigmarchaeota</i> archaeon CG1_02_38_14         | ?                                             |                                                               |                                                |
|                | Nanohaloarchaea   |                                                               | <i>Nanohaloarchaea</i> archaeon SG9                                    | 1                                             | AOV94756.1                                                    |                                                |
|                | Nanoarchaeota     |                                                               | <i>Nanoarchaeum</i> <i>quitans</i> Kin4-M                              | 1                                             | AAR39225.1                                                    |                                                |

20

21 **Table 1: Overview of distribution of TFS paralogues in archaea.**

22 Distribution of archaeal TFS homologs and paralogues. Members of proposed  
 23 superphyla based on references <sup>2-4</sup>. Plasmid-encoded factors are underlined.

24

25

26

27

28

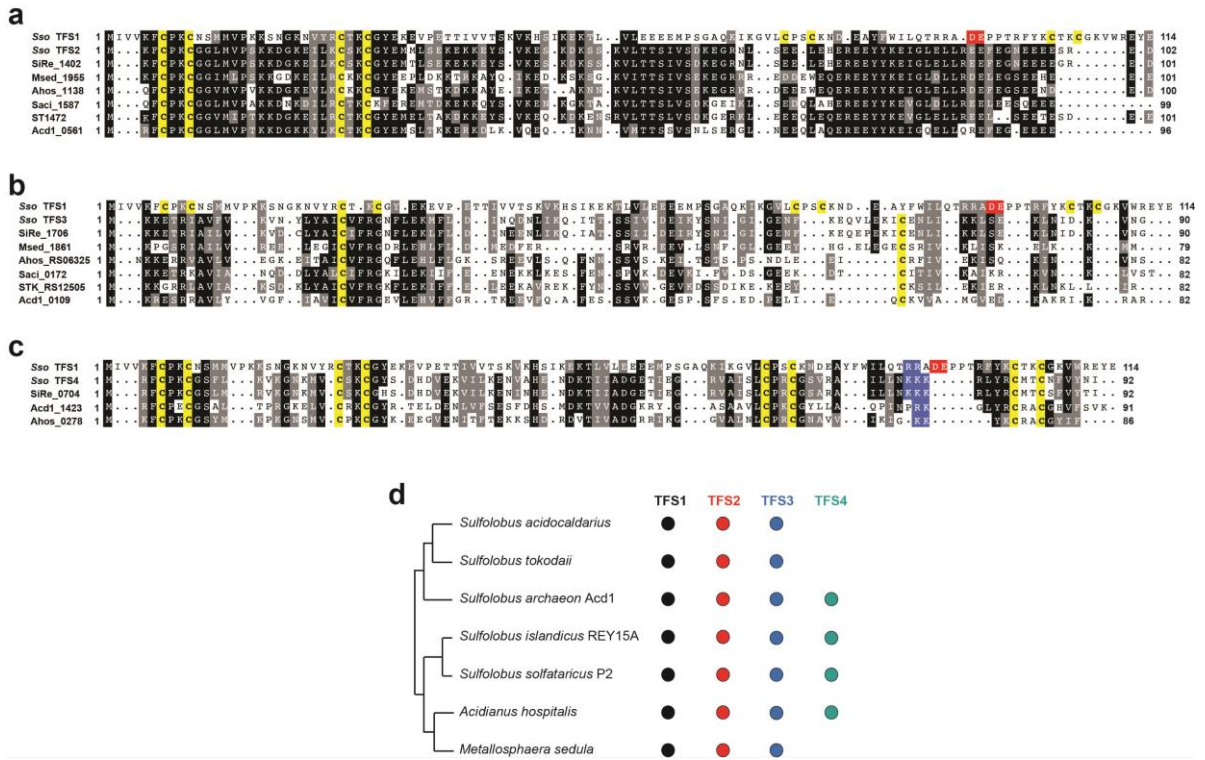

29

30

31 **Supplementary figure 1: Evolutionary conservation of archaeal transcript**  
 32 **cleavage factors paralogues.**

33 **(a)** Amino acid sequence alignment of TFS2, **(b)** TFS3 and **(c)** TFS4 homologues in  
 34 the Sulfolobales order. (a) Sso TFS2 (AAK40916.1), *Sulfolobus islandicus* REY15/4  
 35 SiRe\_1402 (ADX85468.1), *Metallosphaera sedula* DSM 5348 Msed\_1955  
 36 (ABP96095.1), *Acidianus hospitalis* Ahos\_1138 (AEE94022.1), *Sulfolobus*  
 37 *acidocaldarius* DSM 639 Saci\_1587 (AAY80900.1), *Sulfolobus tokodaii str. 7* ST1472  
 38 (WP\_010979520.1), *Sulfolobus Acd1 Acd1\_0561*. (b) Sso TFS3 (AAK40630.1),  
 39 *Sulfolobus islandicus* REY15/4 SiRe\_1706 (ADX85770.1), *Metallosphaera sedula*  
 40 DSM 5348 Msed\_1861 (ABP96001.1), *Acidianus hospitalis* Ahos\_RS06325  
 41 (WP\_048054635.1), *Sulfolobus acidocaldarius* DSM 639 Saci\_0172 (AAY79591.1),  
 42 *Sulfolobus tokodaii str. 7* STK\_RS12505 (WP\_052846758.1), *Sulfolobus Acd1*  
 43 *Acd1\_0109*. (c) Sso TFS4 (AAK42105.1), *Sulfolobus islandicus* REY15/4 SiRe\_0704  
 44 (ADX84786.1), *Sulfolobus Acd1 Acd1\_1423* and *Acidianus hospitalis* Ahos\_0278  
 45 (AEE93169.1). The basic residues in the TFS4 C-ZR are highlighted in blue. For

46 comparison, the sequence of Sso TFS1 was included with the two catalytic acidic  
47 residues highlighted in red. **(d)** Phylogenetic distribution of TFS paralogues in the  
48 Sulfolobales order. The schematic phylogenetic tree is based on reference <sup>5</sup>.

49

50

51

**a**

**Homoduplex**

```
pol592 GATTGATAGAGTAAAGTTTAAATACTTATATAGATAGAGTATAGATAGAGGGTTCAAAAAATGGTT
pol593 CTAACATCTCATTTCAAATTTATGAATATATCTATCTCATATCTCTCCAAGTTTTTACCAA
```

**Heteroduplex**

```
pol592 GATTGATAGAGTAAAGTTTAAATACTTATATAGATAGAGTATAGATAGAGGGTTCAAAAAATGGTT
pol603 CTAACATCTCATTTCAAATTTATGAATATATCTATCTCATA TCTCCAAGTTTTTACCAA
CTCG
```

**b**

**50 bp C-less template**

```
GATTGATAGAGTAAAGTTTAAATACTTATATAGATAGAGTATAGATAGagggtatggaaggagaatataattgagataatt
BRE TATA
+50 +71
ttatgattggggataCgattgaaagaggggaggaag
```

**c**

**Run-off template**

```
GATTGATAGAGTAAAGTTTAAATACTTATATAGATAGAGTATAGATAGagggttcaaaaaatggttttcacgccaaaccga
BRE TATA
+50 +71
aagaagaagaatcgaattccccgcccgcgatggc
```

**d**

**Scaffold template**

```
NTC83 CCGGCAGTACTAGTAATGACCAGGCGTAACACTTTCATCTTAACTACTCTAATGGATCTCCCATATGGTGGAGGTAAGGGTGG
TC83 GGCCGTCATGATCATTACTCGTCCGATTGATGAAGTAGAATTGATGAGATTACCTAGAGGGTATACCACCTCCATTCCCACC
RNA14 GACCAGGCG-3'
5' -AUUUA
```

52

53

54 **Supplementary figure 2: DNA templates used for EMSA and transcription assays**

55 (a) DNA template sequences used for abortive transcription, potassium permanganate

56 footprinting and PIC EMSA assays. The DNA template strand is in blue, the DNA non-

57 template strand is in cyan. For the heteroduplex template, -4 to -1 mismatch sequence

58 is highlighted in red. (b) SSV-T6 promoter 50 nt C-less cassette template used in RNA

59 cleavage and reactivation assays. (c) SSV-T6 promoter run-off template used in

60 promoter-directed transcription assays. (d) Nucleic acid scaffold sequences used in

61 elongation and TEC EMSA assays. The DNA template strand is in blue, the DNA non-

62 template strand is in cyan, and the RNA is in red.

63

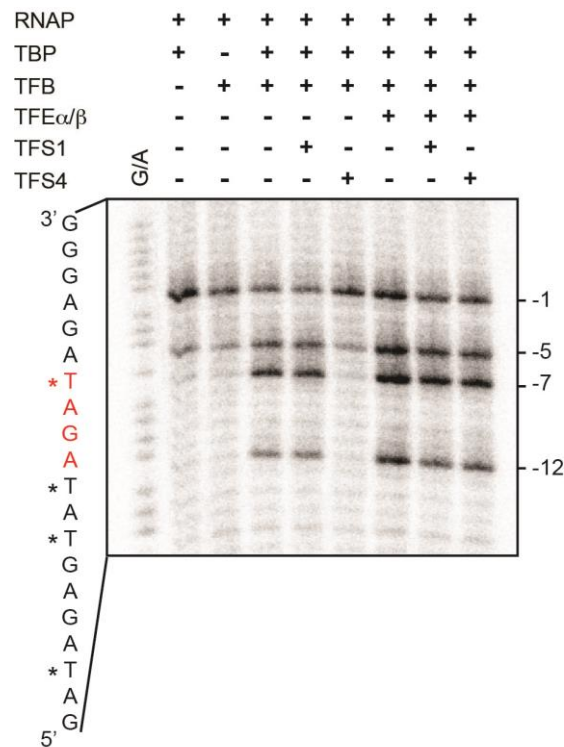

64

65 **Supplementary figure 3: Effect of TFS4 on promoter melting.**

66 The effect of TFS4 on the melting of the SSV1-T6 promoter non-template strand was  
 67 probed using potassium permanganate foot-printing assays. The promoter template  
 68 for the assay is identical to the EMSA probes and includes a 4-nt heteroduplex region  
 69 (register -4 to -1 relative to the TSS, highlighted in red, see also supplementary Fig.  
 70 S2a). The reactive T residue at position -1 serves as positive control in this assay. The  
 71 addition of RNAP in the presence of TBP and TFB induces three additional reactive T-  
 72 residues at positions -5, -7 and -12, which reflect promoter melting in the PIC. The  
 73 addition of TFE $\alpha/\beta$  increases their intensity in agreement with the role of TFE $\alpha/\beta$  during  
 74 transcription initiation <sup>1</sup>. While the addition of TFS1 has little effect on DNA melting,  
 75 TFS4 reduces permanganate reactivity to background levels, TFE $\alpha/\beta$  protects the PIC  
 76 from TFS4 inhibition, in good agreement with our PIC EMSA. The position of all  
 77 reactive T residues is indicated with an asterisk. G/A ladder and the corresponding  
 78 non-template DNA strand sequence are shown on the left.

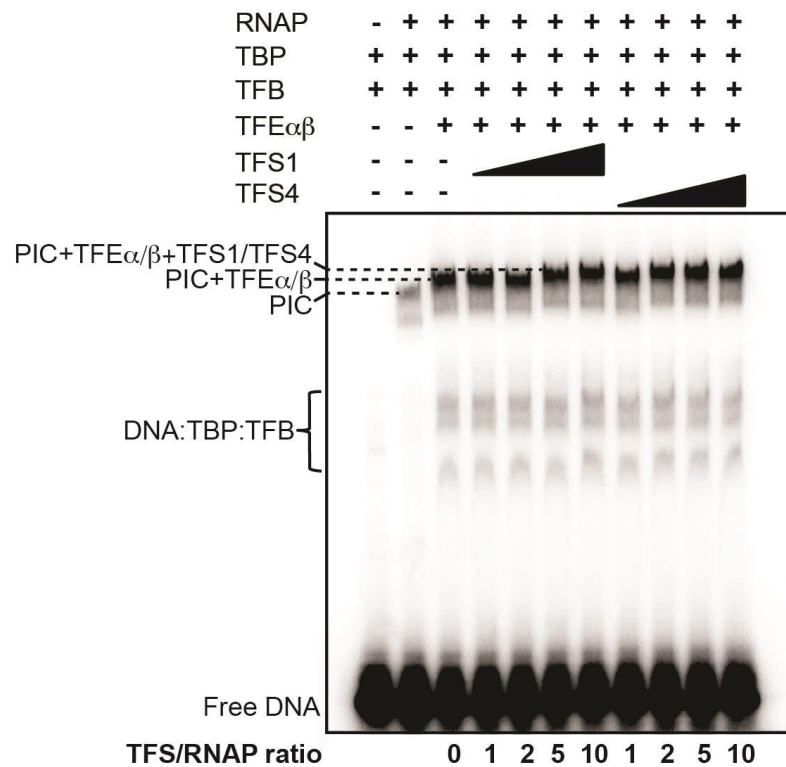

79

80 **Supplementary figure 4: TFS1 and TFS4 are incorporated into the TFE $\alpha/\beta$ -**  
 81 **containing complete PIC.**

82 EMSA assay showing the stepwise assembly of PICs. The addition of TFE $\alpha/\beta$  to  
 83 minimal PIC containing DNA-TBP-TFB-RNAP leads to both a slight upshift and an  
 84 increase in signal intensity of the complete DNA-TBP-TFB-RNAP-TFE PICs. Adding  
 85 either TFS1 or TFS4 induces a subtle but reproducible additional upshift showing that  
 86 both can be incorporated into complete PICs. EMSA was carried out in a low salt (150  
 87 mM) binding buffer and resolved on a 4-20% Tris-Glycine gel.

88

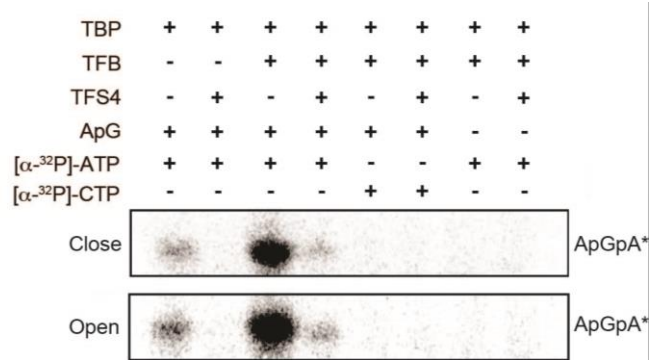

89

90

91 **Supplementary figure 5: Abortive transcription assay controls**

92 Abortive transcription assays measuring the addition of [ $\alpha$ -<sup>32</sup>P]-ATP (correct) or [ $\alpha$ -<sup>32</sup>P]-

93 CTP (noncomplementary) to the dinucleotide primer ApG on homoduplex (closed) and

94 heteroduplex (open) SSV1-T6 promoter templates in the presence or absence of 250

95 nM TFS4.

96



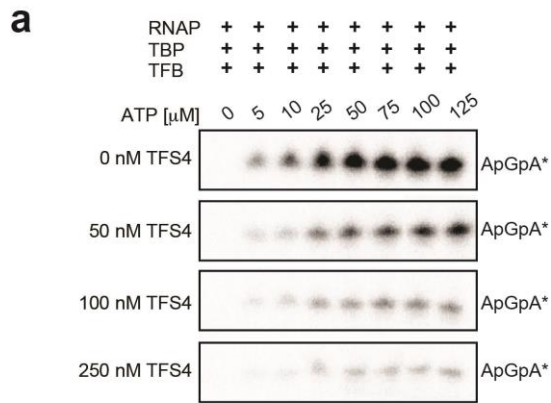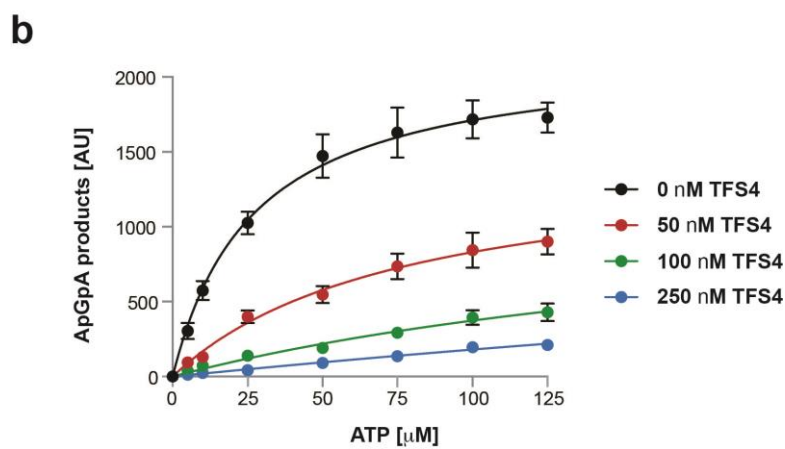

97

98 **Supplementary figure 6: Inhibitory effect of TFS4 on abortive initiation at varying**  
 99 **substrate NTP concentrations.**

100 (a) We tested the effect of increasing substrate NTP concentration on TFS4 inhibition  
 101 of transcription in abortive initiation assays at three TFS4 concentrations (50, 100 and  
 102 250 nM). (b) The 3-nt abortive initiation products were quantified and plotted as a  
 103 function of ATP concentrations for each TFS4 concentration. Error bars represent  
 104 standard deviation based on three technical repeats.

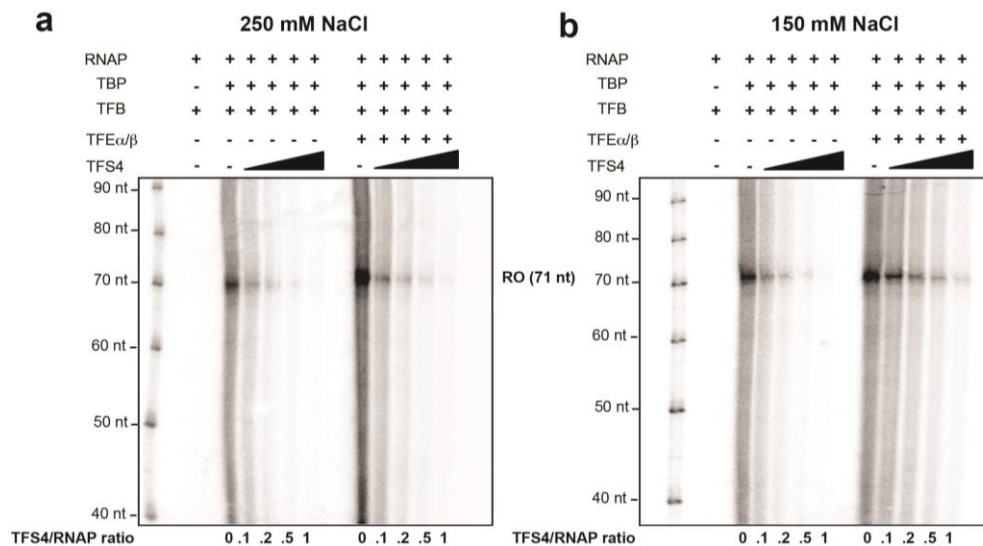

105

106 **Supplementary figure 7: TFE $\alpha/\beta$  interference with TFS4 in promoter-directed**  
 107 **transcription assays.**

108 TFS4 inhibition of transcription in the presence or absence of TFE $\alpha/\beta$  in promoter-  
 109 directed transcription assays under **(a)** high- (250 mM) and **(b)** low-salt (150 mM)  
 110 conditions. In contrast to its interference with PIC formation, TFS4 can inhibit promoter-  
 111 directed transcription in the presence of TFE $\alpha/\beta$ , albeit less efficiently than without.  
 112 This is likely due to the fact that TFS4 interferes with transcription elongation  
 113 complexes. Reactions were carried out using the same conditions as in Figure 4a.

114

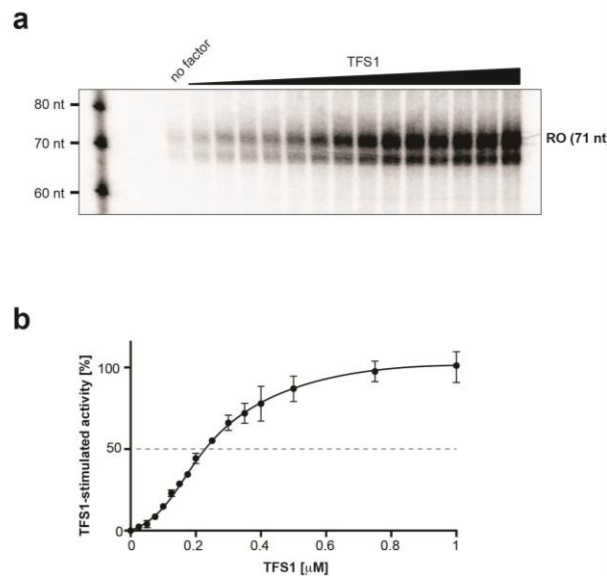

115

116 **Supplementary figure 8: TFS1 relieves TFS4 inhibition**

117 (a) The addition of TFS1 counteracts the inhibitory effects of TFS4 in a dose-  
 118 dependent fashion. In order to compare the apparent relative affinities of RNAP:TFS1  
 119 and RNAP:TFS4 complexes, transcription elongation assays were carried out in the  
 120 presence of 100 nM TFS4 and varying concentrations of TFS1. This concentration of  
 121 TFS4 is sufficient for complete inhibition of RNAP and therefore assumed to be higher  
 122 than the apparent  $K_m$  (and  $K_D$ ) for RNAP:TFS4 complexes. (b) Quantification of  
 123 transcription elongation assay shown in (a). The relief of inhibition by TFS1 likely  
 124 reflects the competition of TFS1 and TFS4 for RNAP binding. Under these conditions  
 125 the  $IC_{50}$  of TFS1 is ~230 nM, i.e. the TFS1 concentration required to achieve 50% relief  
 126 of TFS4 inhibition, where  $K_D$  (RNAP:TFS1) /  $K_D$  (RNAP:TFS4) =  $IC_{50}$  / [TFS4]. The  
 127 amount of run-off products was quantified using ImageQuant TL Software (GE  
 128 Healthcare). Error bars represent standard deviation from three technical repeats.

129

130

131

132

133

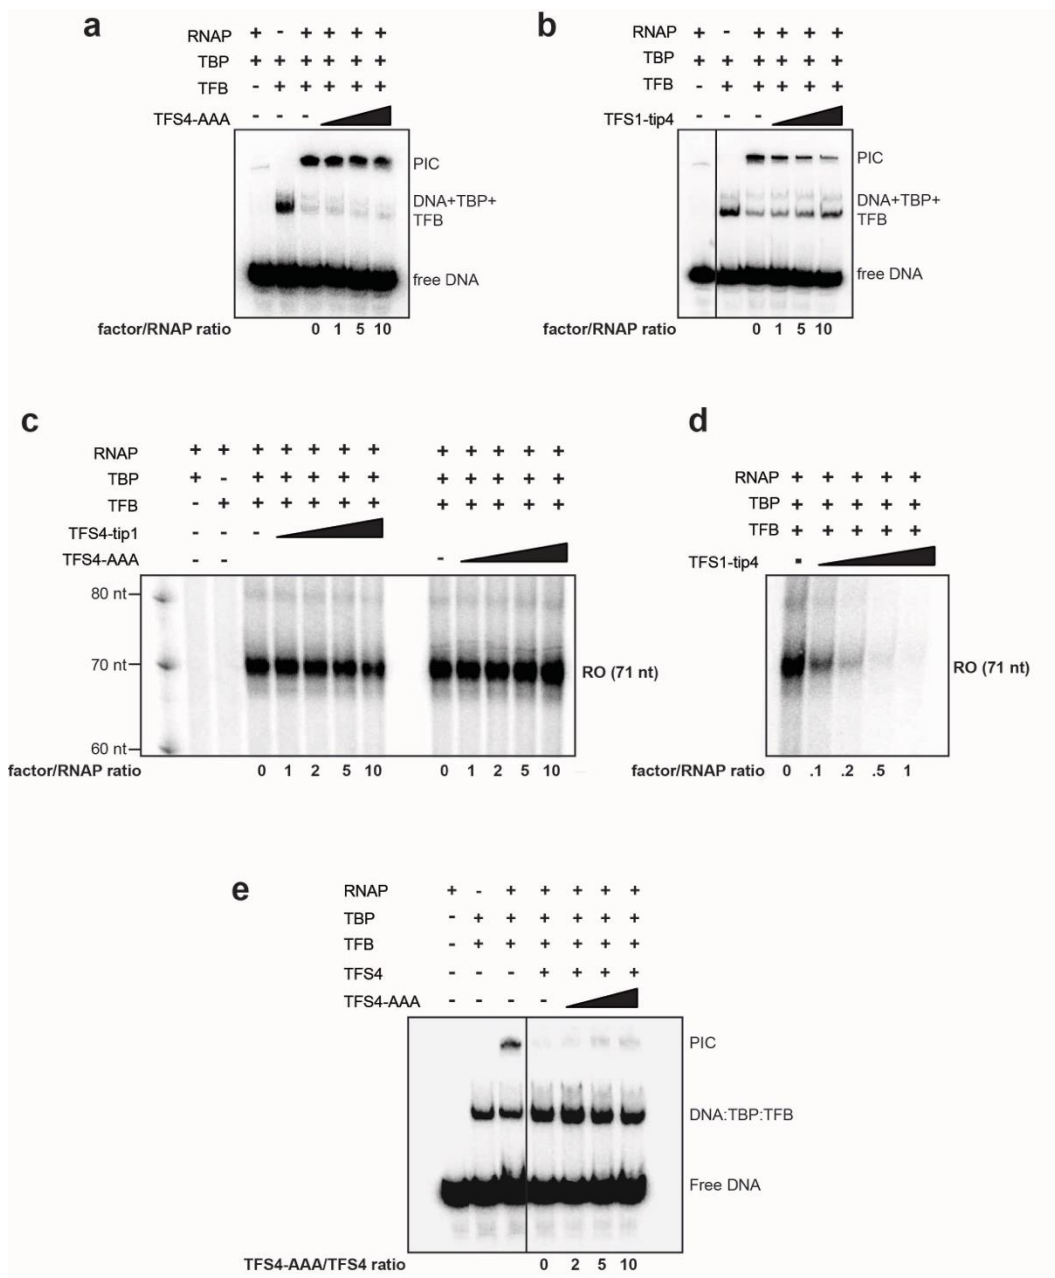

135

136 **Supplementary figure 9: Activity of TFS1 and TFS4 variants in EMSA and**  
 137 **transcription run-off assays**

138 (a) and (b) EMSA with the minimal archaeal PIC complex (SSV1 T6 promoter DNA,  
 139 TBP, TFB, RNAP) using TFS4-AAA (a) and TFS1-tip4 mutants (b) were carried out as  
 140 in figure 3. (c) and (d) Promoter directed transcription assays on the SSV1 T6 promoter  
 141 template in the presence of TFS4-tip1, TFS4-AAA (c) and TFS1-tip4 (d) mutants were

142 carried out as in figure 4. (e) Increasing amount of TFS4-AAA can only partially rescue  
143 the formation of minimal archaeal PIC pre-incubated with TFS4.  
144

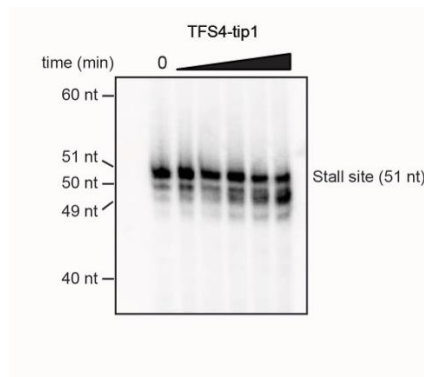

145

146 **Supplementary figure 10: The TFS1 tip motif confers transcript cleavage activity**  
147 **to TFS4.**

148 Transcript cleavage assays were carried out as in figure 2. A chimeric TFS4-tip1  
149 variant encompassing TFS4 and the TFS1 C-ZR tip motif stimulates transcript  
150 cleavage in a dose-dependent fashion similar to TFS1. Reactions were carried out  
151 using the same conditions as in Figure 2b.

152

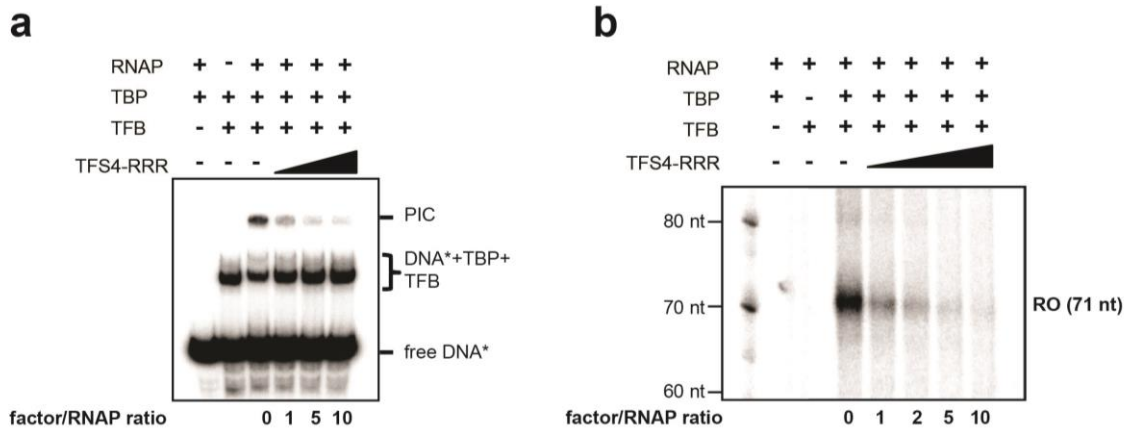

153

154

155 **Supplementary figure 11: Activity of TFS4-RRR in EMSA and transcription run-**  
 156 **off assays**

157 (a) EMSA with the minimal archaeal PIC complex (SSV1 T6 promoter DNA, TBP, TFB,  
 158 RNAP) using the TFS4-RRR mutant was carried out as in Figure 3a. (b) Promoter-  
 159 directed transcription assays using the SSV1-T6 promoter template in the presence of  
 160 the TFS4-RRR mutant was carried out as in Figure 4a.

161

162

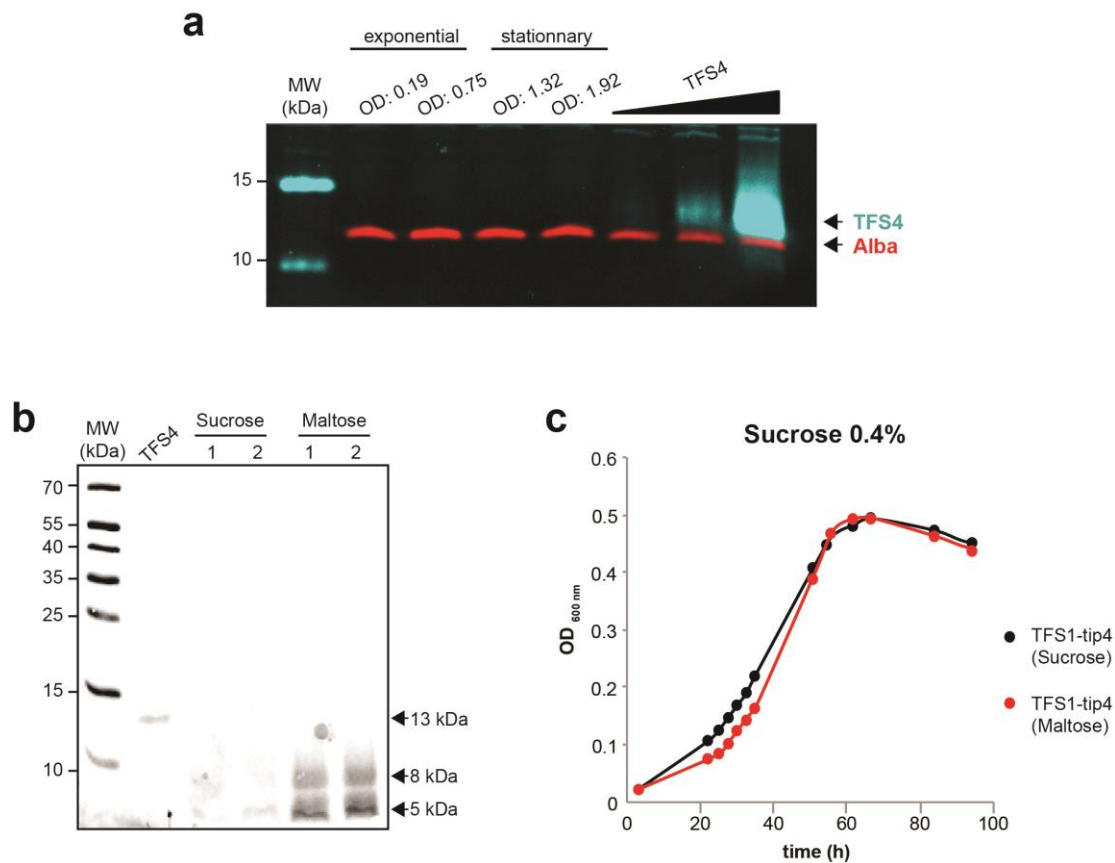

163

164 **Supplementary figure 12: TFS4 expression in *Sulfolobus*.**

165 (a) TFS4 is not expressed during either exponential or stationary phase growth in  
 166 *Sulfolobus solfataricus*. Multiplex Western blot using polyclonal antibodies raised  
 167 against TFS4 and Alba (loading control) in cell lysates during different growth phases  
 168 of *Sulfolobus solfataricus*. 9 µg of total protein was loaded in each lane. The last three  
 169 lanes contain 0.7, 2.8 and 11.2 ng of recombinant TFS4 spiked into cell lysate in order  
 170 to serve as positive control. Immunodetection was performed on three biological  
 171 replicates. (b) Immunodetection of vector-driven ectopically expressed Sso TFS4 in *S.*  
 172 *acidocaldarius* MW001 in sucrose (non-inducible) and maltose media (inducible).  
 173 Western blot analysis was performed using polyclonal antibodies raised against Sso  
 174 TFS4 on two biological replicates. (c) Recovery from TFS1-tip4 growth inhibition. The  
 175 Saci strain harbouring the TFS1-tip4 expression plasmid was cultured under inducing  
 176 (Maltose) or non-inducing conditions (Sucrose) and both cultures were subsequently



177 transferred to a non-inducing media (Sucrose). The growth curve is based on at  
178 least three biological replicates.

179

180

181 **Supplementary References**

- 182 1 Blombach, F. *et al.* Archaeal TFEalpha/beta is a hybrid of TFIIE and the RNA  
183 polymerase III subcomplex hRPC62/39. *Elife* **4**, e08378,  
184 doi:10.7554/eLife.08378 (2015).
- 185 2 Rinke, C. *et al.* Insights into the phylogeny and coding potential of microbial  
186 dark matter. *Nature* **499**, 431-437, doi:10.1038/nature12352 (2013).
- 187 3 Guy, L. & Ettema, T. J. The archaeal 'TACK' superphylum and the origin of  
188 eukaryotes. *Trends Microbiol* **19**, 580-587, doi:10.1016/j.tim.2011.09.002  
189 (2011).
- 190 4 Zaremba-Niedzwiedzka, K. *et al.* Asgard archaea illuminate the origin of  
191 eukaryotic cellular complexity. *Nature* **541**, 353-358, doi:10.1038/nature21031  
192 (2017).
- 193 5 Podar, M. *et al.* Insights into archaeal evolution and symbiosis from the  
194 genomes of a nanoarchaeon and its inferred crenarchaeal host from Obsidian  
195 Pool, Yellowstone National Park. *Biol Direct* **8**, 9, doi:10.1186/1745-6150-8-9  
196 (2013).
- 197
